# Supplementary material
Source: MDPI journal article supplement (https://www.mdpi.com/2220-9964/12/4/142)
Supplement: s1 [file s1]

# A comparison of Machine Learning Models for mapping tree species using WorldView-2 imagery in the agroforestry landscape of West Africa

**Supplementary Table S1.** Comparison of actual tree species count before and after applying SMOTE sampling.

| Tree Species            | Actual Trees Frequency | Trees Frequency after SMOTE |
|-------------------------|------------------------|-----------------------------|
| Faidherbia albida       | 15                     | 30                          |
| Anogeissus leiocarpus   | 24                     | 35                          |
| Mangifera indica        | 11                     | 25                          |
| Azadirachta indica      | 70                     | 70                          |
| Parkia biglobosa        | 19                     | 35                          |
| Tamarindus indica       | 16                     | 30                          |
| Vitellaria paradoxa     | 13                     | 20                          |
| Piliostigma reticulatum | 25                     | 40                          |
| Diospyros mespiliformis | 17                     | 40                          |

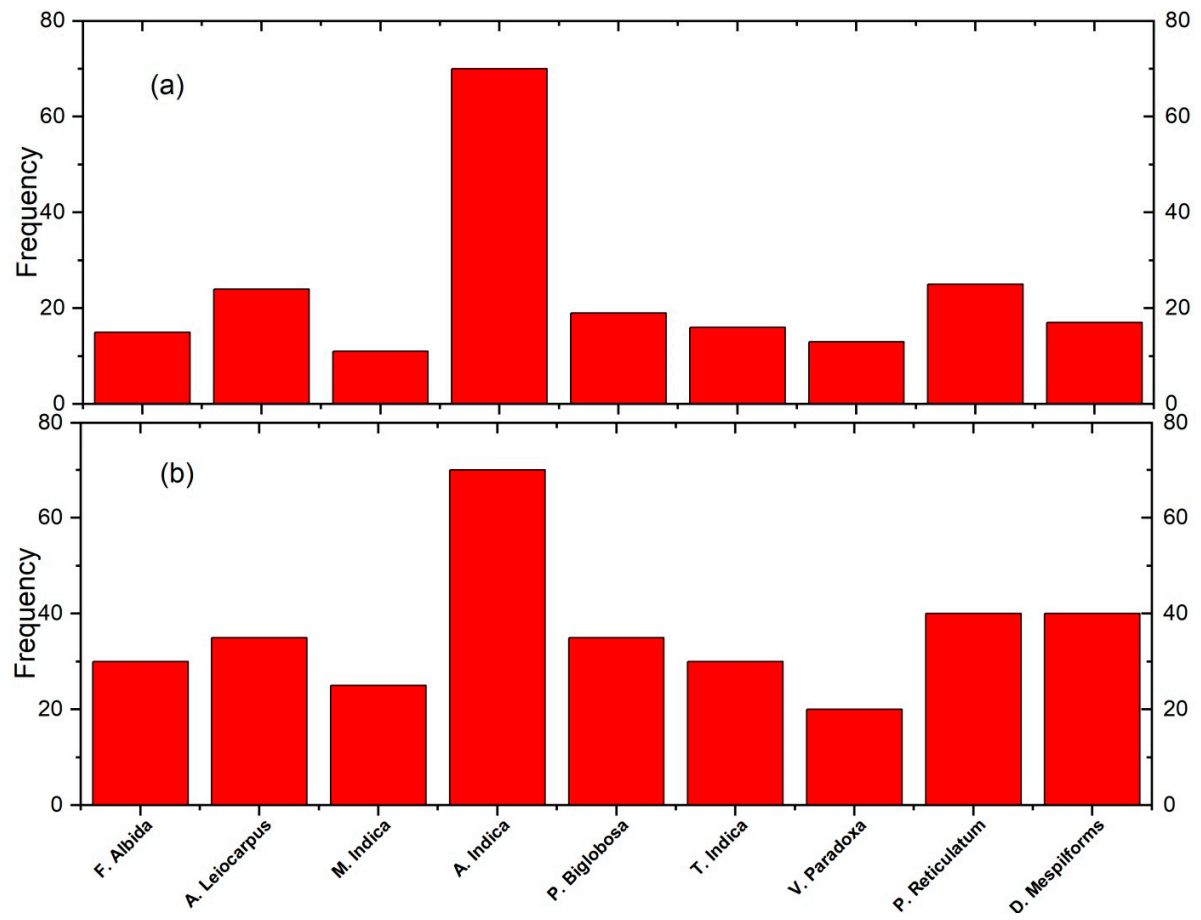

**Figure S1.** (a) Actual tree species frequency based on reference dataset; (b) Tree species frequency after applying SMOTE.

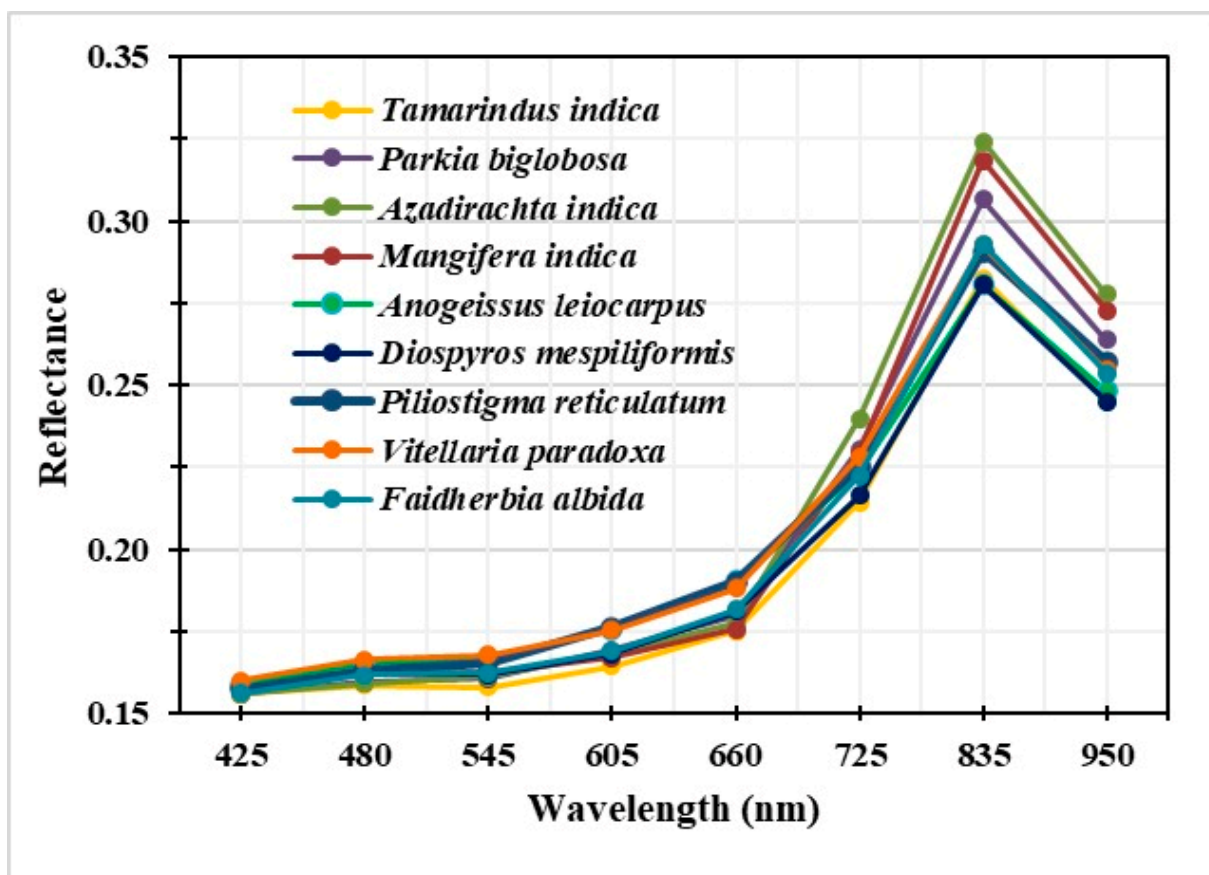

Figure S2. Mean spectral reflectance curve of the nine major tree species.

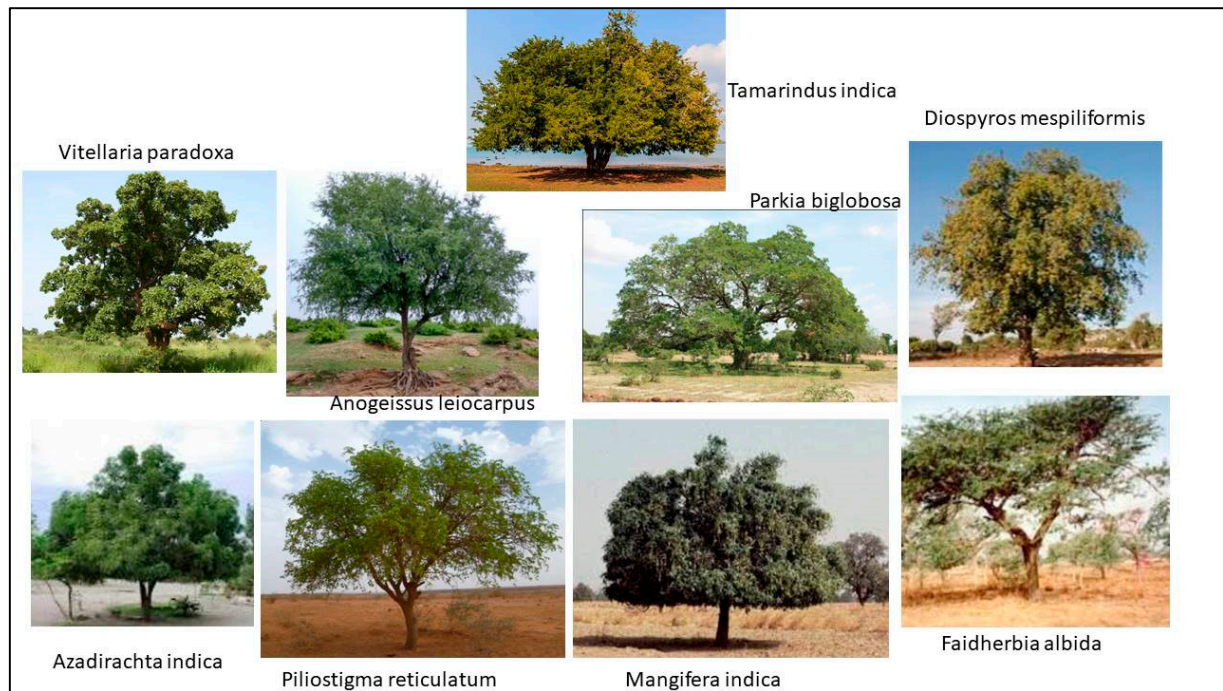

**Figure S3.** Visual appearance of dominant tree species.
